# Supplementary material
Source: PubMed Central journal article supplement (PMC3857766)

**Hyman *et al.***

**Diversity of the vaginal microbiome correlates with preterm birth.**

**MS # RSCI-13-021**

**Supplementary data**

**Supplementary Tables**

Table S1. Participant characterization by risk, ethnicity, pregnancy outcome, and vaginal swabs collected and analyzed.

| <b>ID</b> | <b>Risk</b> | <b>Ethnicity</b> | <b>Outcome</b> | <b>Swab 1</b> | <b>Swab 2</b> | <b>Swab 3</b> |
|-----------|-------------|------------------|----------------|---------------|---------------|---------------|
| 001       | H           | Other            | Term           |               | X             | X             |
| 002       | H           | African-American | Term           |               | X             | X             |
| 003       | H           | Hispanic         | Term           | X             |               |               |
| 004       | H           | Asian            | Term           |               | X             | X             |
| 005       | H           | Caucasian        | Term           | X             | X             | X             |
| 006       | H           | African-American | PTB            |               |               | X             |
| 007       | H           | Caucasian        | PTB            |               | X             |               |
| 008       | H           | Caucasian        | Term           |               | X             |               |
| 009       | H           | Asian            | PTB            |               |               | X             |
| 012       | L           | Asian            | PTB            |               | X             |               |
| 015       | L           | Asian            | Term           |               | X             |               |
| 016       | L           | Other            | Term           |               | X             |               |
| 017       | L           | Other            | Term           |               | X             |               |
| 018       | L           | Caucasian        | Term           |               | X             |               |
| 019       | L           | Caucasian        | Term           |               | X             |               |
| 021       | L           | Caucasian        | Term           |               | X             |               |
| 026       | L           | Caucasian        | Term           | X             | X             | X             |
| 027       | L           | Other            | Term           | X             | X             | X             |
| 028       | L           | Caucasian        | Term           |               |               | X             |
| 029       | L           | Caucasian        | Term           | X             | X             |               |
| 030       | L           | Caucasian        | Term           | X             | X             | X             |
| 031       | L           | Caucasian        | Term           | X             |               |               |
| 032       | L           | Caucasian        | Term           | X             |               |               |
| 034       | L           | Caucasian        | Term           | X             | X             |               |
| 035       | L           | Hispanic         | SAB            | X             |               |               |
| 036       | L           | Caucasian        | Term           | X             |               |               |
| 038       | L           | Caucasian        | Term           | X             | X             |               |
| 039       | L           | Caucasian        | Term           |               |               | X             |
| 042       | H           | Caucasian        | Term           |               | X             | X             |
| 044       | L           | Hispanic         | PTB            |               |               | X             |
| 045       | L           | Other            | Term           | X             | X             |               |
| 048       | H           | Asian            | Term           |               |               | X             |
| 049       | H           | Asian            | Term           | X             | X             | X             |
| 050       | H           | Caucasian        | Term           |               | X             |               |
| 051       | L           | Other            | Term           | X             | X             |               |
| 052       | L           | Asian            | Term           |               | X             |               |
| 053       | L           | Hispanic         | Term           | X             |               |               |
| 055       | H           | Hispanic         | Term           |               |               | X             |
| 057       | L           | Caucasian        | Term           | X             | X             |               |

|     |   |                  |      |   |   |   |
|-----|---|------------------|------|---|---|---|
| 058 | L | Caucasian        | PTB* | X | X | X |
| 059 | H | Hispanic         | Term |   |   | X |
| 060 | L | Caucasian        | PTB  | X | X | X |
| 061 | L | Other            | Term |   | X |   |
| 062 | L | Asian            | Term | X |   |   |
| 063 | H | Asian            | Term |   |   | X |
| 064 | L | Caucasian        | SAB  | X |   |   |
| 065 | L | Caucasian        | Term | X | X |   |
| 067 | L | Caucasian        | Term | X |   |   |
| 069 | L | Other            | PTB  |   |   | X |
| 070 | H | Asian            | Term | X | X | X |
| 072 | H | Hispanic         | Term |   | X | X |
| 073 | H | African-American | Term | X |   |   |
| 074 | H | African-American | SAB  | X |   |   |
| 075 | H | Hispanic         | Term |   |   | X |
| 076 | H | Asian            | Term |   |   | X |
| 077 | H | Caucasian        | Term |   |   | X |
| 078 | H | Hispanic         | Term |   |   | X |
| 079 | H | Caucasian        | Term | X | X | X |
| 081 | H | African-American | PTB  |   |   | X |
| 082 | H | Other            | Term |   |   | X |
| 083 | H | Caucasian        | PTB  | X | X |   |
| 084 | H | Asian            | Term |   |   | X |
| 085 | H | Caucasian        | Term | X | X | X |
| 086 | H | Other            | PTB  | X | X |   |
| 087 | H | Caucasian        | PTB  |   | X |   |
| 088 | H | Asian            | Term |   | X |   |
| 089 | L | Hispanic         | PTB  |   |   | X |
| 090 | H | Caucasian        | Term | X | X | X |
| 091 | H | Hispanic         | Term | X | X | X |
| 092 | H | Caucasian        | PTB  |   | X |   |
| 093 | H | Hispanic         | Term |   | X | X |
| 097 | H | African-American | Term |   | X | X |
| 098 | H | Caucasian        | SAB  | X |   |   |
| 099 | H | Asian            | Term | X |   | X |
| 100 | L | Asian            | PTB  |   |   | X |
| 101 | H | Caucasian        | Term | X | X |   |
| 102 | H | Caucasian        | Term | X |   | X |
| 103 | H | Asian            | PTB  | X | X |   |
| 104 | L | Caucasian        | Term | X |   |   |
| 105 | L | Caucasian        | SAB  | X |   |   |
| 106 | L | Caucasian        | Term | X |   |   |
| 107 | L | African-American | Term | X | X | X |
| 108 | L | Hispanic         | Term | X | X | X |
| 109 | H | Caucasian        | PTB  |   | X |   |
| 110 | H | Caucasian        | Term |   | X |   |
| 111 | L | Other            | Term |   |   | X |
| 112 | L | Caucasian        | Term | X | X |   |
| 113 | H | African-         | Term |   | X | X |

|  |  |          |  |  |  |  |
|--|--|----------|--|--|--|--|
|  |  | American |  |  |  |  |
|--|--|----------|--|--|--|--|

Risk Factor for PTB: H = high-risk. L = low-risk. Outcomes: term; PTB, and SAB (miscarriage). Ethnicity: Caucasian, African-American, Hispanic, Asian, Other (mixed ethnicity, Pacific Islander, native Hawaiian, native American, and Alaska native). X = swabs for which there is sequence data. \*Induced.

Table S2. Participant ethnicities and number of vaginal swabs.

| Ethnicity        | Number of participants | Percentage | Number of swabs | Percentage |
|------------------|------------------------|------------|-----------------|------------|
| Asian            | 16                     | 18         | 23              | 17         |
| African-American | 8                      | 9          | 13              | 9          |
| Caucasian        | 40                     | 45         | 66              | 48         |
| Hispanic         | 13                     | 15         | 19              | 14         |
| Other            | 11                     | 13         | 17              | 12         |
| Total            | 88                     | 100%       | 138             | 100%       |

Other= mixed ethnicity, Pacific Islander, native Hawaiian, Native American, and Alaska native.

Table S3. **A.** All of the bacterial identification data are available on the SGTC website. [http://med.stanford.edu/sgtc/research/microbiome\\_preterm\\_birth.html](http://med.stanford.edu/sgtc/research/microbiome_preterm_birth.html). The percent of the sequence reads supporting the presence of any given bacterium was recorded when that percent was at least 1% (usually 3 sequence reads). Bacteria supported by <1% of the sequence reads are indicated by an asterisk. **B.** The bacterial identification data for the 14 participants for whom we have a swab in all three trimesters. These data were abstracted from Table S3A.

Table S4. Little or no *Lactobacillus* (13 swabs).

| Risk  | Outcome | ID/Swab                                   | <i>Lactobacillus</i> | Percent |
|-------|---------|-------------------------------------------|----------------------|---------|
| Low   | PTB     | None                                      |                      |         |
|       |         | 107-1                                     | Uncultured           | 7       |
|       |         | 107-2                                     | <i>L. iners</i>      | 8       |
|       |         | 026-3                                     |                      | Zero    |
| High  | SAB     | None                                      |                      |         |
|       |         |                                           |                      |         |
|       |         |                                           |                      |         |
|       | PTB     | 103-1                                     |                      | Zero    |
|       |         | 103-2                                     |                      | Zero    |
|       | Term    | 001-2                                     | <i>L. iners</i>      | 6       |
|       |         | 059-3                                     | <i>L. iners</i>      | 8       |
|       |         | 070-1                                     |                      | Zero    |
|       |         | 070-2                                     |                      | Zero    |
|       |         | 070-3                                     |                      | Zero    |
| 110-2 |         | <i>L. acidophilus</i> + <i>L. gasseri</i> | 4 + 9 = 13           |         |
| 113-2 |         | <i>L. iners</i>                           | 6                    |         |
| SAB   | 074-1   | <i>L. iners</i> + <i>L. ultunensis</i>    | 6 + 17 = 23          |         |

Uncultured = uncultured *Lactobacillus*, as per the RDP.

Table S5. Putative Novel bacteria (> or = 1%). The closest named bacterium is given for 14 swabs.

| Risk | Outcome | ID/Swab | Closest named bacterium | Percent |
|------|---------|---------|-------------------------|---------|
| Low  | PTB     | None    |                         |         |
|      |         | 031-1   | <i>Lactobacillus</i>    | 1       |

|      |      |       |                        |     |
|------|------|-------|------------------------|-----|
|      |      | 053-1 | <i>Bacteroidales</i>   | 1   |
|      |      |       | <i>Parvimonas</i>      | 1   |
|      |      |       | <i>Prevotella</i>      | 10  |
|      |      | 104-1 | <i>Mycoplasma</i>      | 6   |
|      |      |       | <i>Prevotella</i>      | 11  |
|      |      | 107-2 | <i>Parvimonas</i>      | 1   |
|      |      |       | <i>Prevotella</i>      | 1   |
|      |      | 107-3 | <i>Dialister</i>       | 1   |
|      | SAB  | None  |                        |     |
| High | PTB  | None  |                        |     |
|      | Term | 005-3 | <i>Lactobacillus</i>   | 1   |
|      |      | 070-3 | <i>Lachnospiraceae</i> | 4   |
|      |      | 073-1 | <i>Megasphaera</i>     | 1   |
|      |      | 076-3 | <i>Lactobacillus</i>   | 100 |
|      |      | 079-1 | <i>Lactobacillus</i>   | 3   |
|      |      | 084-3 | <i>Lactobacillus</i>   | 3   |
|      |      | 090-3 | <i>Lactobacillus</i>   | 1   |
|      |      | 091-2 | <i>Prevotella</i>      | 2   |
|      | SAB  | 074-1 | <i>Prevotella</i>      | 33  |

Table S6. Percentage (> or =1%) of *Atopobium* content of 23 swabs.

| Risk | Outcome | ID/Swab | <i>Atopobium</i> (%) | Uncultured <i>Atopobium</i> (%) | Total <i>Atopobium</i> (%) |
|------|---------|---------|----------------------|---------------------------------|----------------------------|
| Low  | PTB     | None    |                      |                                 |                            |
|      | Term    | 026-3   | 100                  |                                 | 100                        |
|      |         | 057-2   | 4                    |                                 | 4                          |
|      |         | 104-1   | 3                    | 3                               | 6                          |
|      |         | 107-1   | 4                    | 5                               | 9                          |
|      |         | 107-2   | 6                    | 1                               | 7                          |
|      |         | 107-3   |                      | 1                               | 1                          |
|      |         | 108-2   |                      | 1                               | 1                          |
|      | SAB     | None    |                      |                                 |                            |
| High | PTB     | None    |                      |                                 |                            |
|      | Term    | 001-2   | 2                    | 3                               | 5                          |
|      |         | 002-2   | 4                    | 4                               | 8                          |
|      |         | 002-3   | 4                    | 29                              | 33                         |
|      |         | 059-3   | 2                    | 8                               | 10                         |
|      |         | 070-1   | 5                    | 19                              | 24                         |
|      |         | 070-2   | 9                    |                                 | 9                          |
|      |         | 070-3   |                      | 11                              | 11                         |
|      |         | 073-1   | 3                    | 2                               | 5                          |
|      |         | 075-3   | 3                    |                                 | 3                          |
|      |         | 078-3   |                      | 2                               | 2                          |
|      |         | 079-3   |                      | 6                               | 6                          |
|      |         | 091-1   | 6                    | 3                               | 9                          |
|      |         | 091-2   | 2                    | 2                               | 4                          |
|      |         | 110-2   | 84                   |                                 | 84                         |
|      |         | 113-2   |                      | 12                              | 12                         |
|      | SAB     | 074-1   | 6                    | 10                              | 16                         |

Uncultured = uncultured *Atopobium*, as per the RDP.

Table S7. Percentage (> or = 1%) of *Prevotella* content of 22 swabs.

| Risk | Outcome | ID/Swab | <i>Prevotella</i> (%) | Uncultured <i>Prevotella</i> (%) | Novel <i>Prevotella</i> (%) | Total <i>Prevotella</i> (%) |    |
|------|---------|---------|-----------------------|----------------------------------|-----------------------------|-----------------------------|----|
| Low  | PTB     | 089-3   | 6                     |                                  |                             | 6                           |    |
|      |         | Term    | 028-3                 | 4                                |                             | 4                           |    |
|      |         |         | 053-1                 | 6                                |                             | 10                          | 16 |
|      |         |         | 104-1                 |                                  | 3                           | 11                          | 14 |
|      |         |         | 107-1                 | 19                               | 23                          |                             | 42 |
|      | SAB     | None    |                       |                                  |                             |                             |    |
| High | PTB     | None    |                       |                                  |                             |                             |    |
|      |         | Term    | 001-2                 | 8                                | 3                           |                             | 11 |
|      |         |         | 002-2                 | 1                                | 4                           |                             | 5  |
|      |         |         | 002-3                 |                                  | 29                          |                             | 29 |
|      |         |         | 059-3                 |                                  | 8                           |                             | 8  |
|      |         |         | 070-1                 |                                  | 19                          |                             | 19 |
|      |         |         | 070-2                 |                                  | 2                           |                             | 2  |
|      |         |         | 070-3                 |                                  | 11                          |                             | 11 |
|      |         |         | 073-1                 | 4                                | 14                          |                             | 18 |
|      |         |         | 078-3                 | 16                               | 2                           |                             | 18 |
|      |         |         | 079-3                 |                                  | 6                           |                             | 6  |
|      |         |         | 090-2                 | 1                                |                             |                             | 1  |
|      |         |         | 091-1                 | 3                                | 9                           |                             | 12 |
|      |         |         | 091-2                 |                                  | 4                           | 2                           | 6  |
|      |         |         | 097-2                 | 3                                |                             |                             | 3  |
|      |         |         | 113-2                 | 2                                | 12                          |                             | 14 |
|      | SAB     | 074-1   |                       | 10                               | 33                          | 43                          |    |

Uncultured = uncultured *Prevotella*, as per the RDP. Novel = matches < 97% to its closest match in the RDP. For this table, the closest match to a named bacterium is *Prevotella*.

Table S8. Assorted noxious bacteria at > or = 1% for 20 swabs.

| Risk | Outcome | ID/Swab | Bacterium (%)          | Uncultured (%)      | Novel (%) | Total (%) |  |
|------|---------|---------|------------------------|---------------------|-----------|-----------|--|
| Low  | PTB     |         | <i>Ureaplasma</i>      |                     |           |           |  |
|      |         |         | 069-3                  | 1                   |           | 1         |  |
|      |         |         | 089-3                  | 1                   |           | 1         |  |
|      |         |         | 100-3                  | 73                  |           | 73        |  |
|      |         | Term    |                        | <i>Fingoldia</i>    |           |           |  |
|      |         |         | 069-3                  | 3                   |           | 3         |  |
|      |         |         | <i>Gardnerella</i>     |                     |           |           |  |
|      |         | 107-3   | 1                      |                     |           | 1         |  |
|      | SAB     | None    |                        |                     |           |           |  |
| High | PTB     |         | <i>Bifidobacterium</i> |                     |           |           |  |
|      |         |         | 009-3                  | 3                   |           | 3         |  |
|      |         |         | 103-1                  | 97                  |           | 97        |  |
|      |         |         | 103-2                  | 97                  |           | 97        |  |
|      |         | Term    |                        |                     | 1         | 1         |  |
|      |         |         | 049-1                  |                     | 2         | 2         |  |
|      |         |         | 049-2                  |                     | 3         | 3         |  |
|      |         |         |                        | <i>Enterococcus</i> |           |           |  |
|      |         | 049-1   | 14                     |                     |           | 14        |  |

|  |     |       |                        |    |   |    |
|--|-----|-------|------------------------|----|---|----|
|  |     |       | <i>Finegoldia</i>      |    |   |    |
|  |     | 005-1 | 2                      |    |   | 2  |
|  |     |       | <i>Gardnerella</i>     |    |   |    |
|  |     | 002-2 | 4                      |    |   | 4  |
|  |     | 075-3 | 4                      |    |   | 4  |
|  |     |       | <i>Lachnospiraceae</i> |    |   |    |
|  |     | 059-3 | 61                     |    |   | 61 |
|  |     | 070-2 |                        | 63 |   | 63 |
|  |     | 070-3 |                        | 59 | 4 | 63 |
|  |     | 113-2 |                        | 58 |   | 58 |
|  |     |       | <i>Ureaplasma</i>      |    |   |    |
|  |     | 003-1 | 2                      |    |   |    |
|  | SAB | None  |                        |    |   |    |

Uncultured = uncultured bacterium, as per the RDP; Novel = matches < 97% to any sequence in the RDP. The closest named bacterium is *Lachnospiraceae*.

Table S9. Shannon Diversity Index (SDI) for each swab.

| Risk | Outcome | ID  | Swab 1 | Swab 2 | Swab 3 |
|------|---------|-----|--------|--------|--------|
| Low  | PTB     | 012 |        | 0.21   |        |
|      |         | 044 |        |        | 0.00   |
|      |         | 058 | 0.22   | 0.00   | 0.34   |
|      |         | 060 | 0.00   | 0.23   | 0.05   |
|      |         | 069 |        |        | 2.25   |
|      |         | 089 |        |        | 2.27   |
|      |         | 100 |        |        | 1.40   |
|      | Term    | 015 |        | 0.37   |        |
|      |         | 016 |        | 0.40   |        |
|      |         | 017 |        | 0.25   |        |
|      |         | 018 |        | 0.99   |        |
|      |         | 019 |        | 0.13   |        |
|      |         | 021 |        | 0.00   |        |
|      |         | 026 | 0.03   | 0.03   | 0.06   |
|      |         | 027 | 0.00   | 0.00   | 0.11   |
|      |         | 028 |        |        | 1.92   |
|      |         | 029 | 0.32   | 1.02   |        |
|      |         | 030 | 0.23   | 0.35   | 0.47   |
|      |         | 031 | 1.18   |        |        |
|      |         | 032 | 0.28   |        |        |
|      |         | 034 | 1.23   |        |        |
|      |         | 036 | 1.33   |        |        |
|      |         | 038 | 0.68   | 0.17   |        |
|      |         | 039 |        |        | 1.19   |
|      |         | 045 | 1.04   | 0.84   |        |
|      |         | 051 | 0.00   | 0.98   |        |
|      |         | 052 |        | 0.07   |        |
|      |         | 053 | 2.78   |        |        |
|      |         | 057 | 0.15   | 0.47   |        |
|      |         | 061 |        | 1.59   |        |
|      |         | 062 | 0.00   |        |        |
|      |         | 065 | 0.03   | 0.03   |        |
|      |         | 067 | 0.00   |        |        |
|      |         | 104 | 2.32   |        |        |

|      |      |     |      |      |      |
|------|------|-----|------|------|------|
|      |      | 106 | 0.00 |      |      |
|      |      | 107 | 3.31 | 3.28 | 3.22 |
|      |      | 108 | 0.11 | 2.17 | 1.70 |
|      |      | 111 |      |      | 1.81 |
|      |      | 112 | 0.00 | 0.43 |      |
|      | SAB  | 035 | 0.21 |      |      |
|      |      | 064 | 0.00 |      |      |
|      |      | 105 | 0.03 |      |      |
| High | PTB  | 006 |      |      | 1.45 |
|      |      | 007 |      | 0.11 |      |
|      |      | 009 |      |      | 0.63 |
|      |      | 081 |      |      | 0.60 |
|      |      | 083 | 0.13 | 0.26 |      |
|      |      | 086 | 0.60 | 1.08 |      |
|      |      | 087 |      | 0.03 |      |
|      |      | 092 |      | 0.00 | 0.77 |
|      |      | 103 | 0.23 | 0.24 |      |
|      |      | 109 |      | 0.00 |      |
|      | Term | 001 |      | 2.19 | 0.12 |
|      |      | 002 |      | 2.17 | 2.63 |
|      |      | 003 | 1.25 |      |      |
|      |      | 004 |      | 0.46 | 0.66 |
|      |      | 005 | 1.05 | 0.29 | 0.20 |
|      |      | 008 |      | 0.13 |      |
|      |      | 042 |      | 0.03 | 0.05 |
|      |      | 048 |      |      | 1.09 |
|      |      | 049 | 1.95 | 1.42 | 1.02 |
|      |      | 050 |      | 0.54 |      |
|      |      | 055 |      |      | 0.03 |
|      |      | 059 |      |      | 1.95 |
|      |      | 063 |      |      | 0.27 |
|      |      | 070 | 2.05 | 1.59 | 1.84 |
|      |      | 072 |      | 1.09 | 1.18 |
|      |      | 073 | 3.05 |      |      |
|      |      | 075 |      |      | 0.57 |
|      |      | 076 |      |      | 0.05 |
|      |      | 077 |      |      | 0.13 |
|      |      | 078 |      |      | 2.29 |
|      |      | 079 | 1.88 | 1.02 | 0.65 |
|      |      | 082 |      |      | 0.55 |
|      |      | 084 |      |      | 0.35 |
|      |      | 085 | 0.00 | 0.00 | 0.24 |
|      |      | 088 |      | 0.16 |      |
|      |      | 090 | 0.05 | 0.32 | 0.15 |
|      |      | 091 | 2.96 | 2.23 | 0.59 |
|      |      | 093 |      | 1.00 |      |
|      |      | 097 |      | 1.71 | 0.15 |
|      |      | 099 | 0.92 |      | 0.37 |
|      |      | 101 | 1.55 | 0.03 |      |
|      |      | 102 | 0.00 |      | 0.42 |
|      |      | 110 |      | 0.92 |      |
|      |      | 113 |      | 2.14 | 1.13 |
|      | SAB  | 074 | 3.03 |      |      |

|        |  |     |      |    |    |
|--------|--|-----|------|----|----|
|        |  | 098 | 0.28 |    |    |
| Number |  |     | 43   | 51 | 44 |

SAB = miscarriage

## Figures

Figure S1. SDI by race/ethnicity

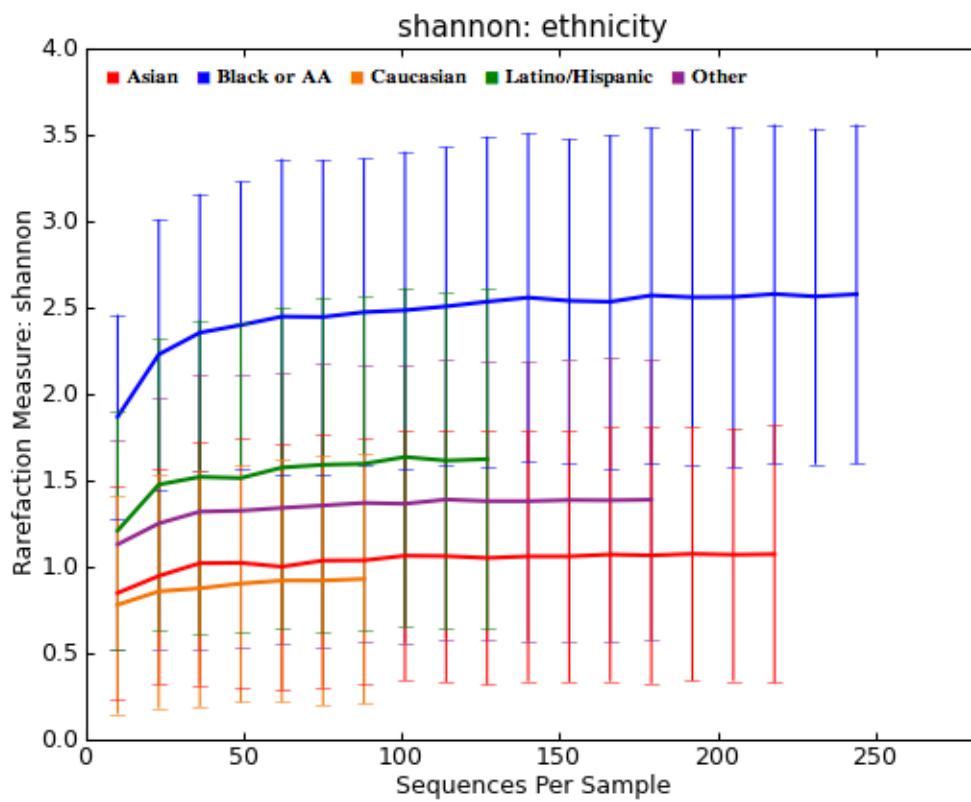



Figure S2. Principal Coordinate Analyses (PCoA) of ethnicity.

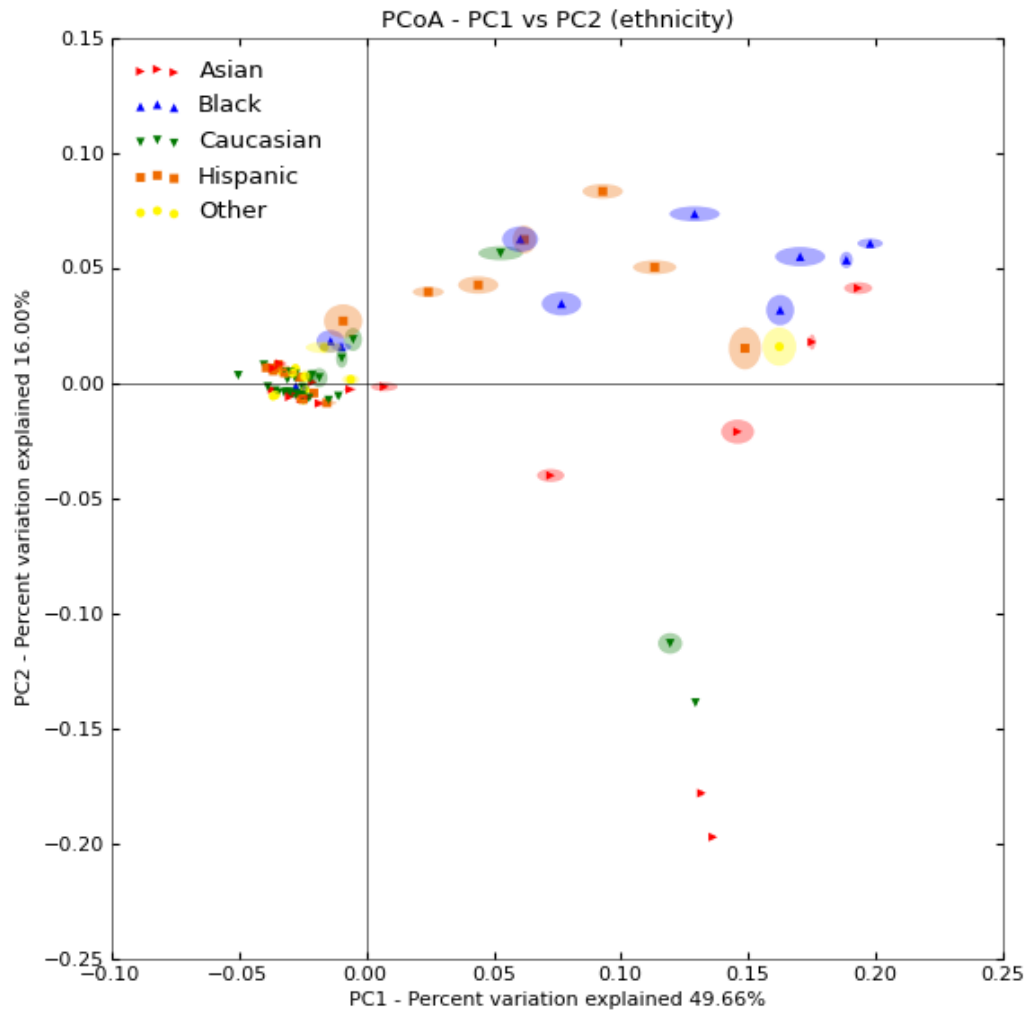

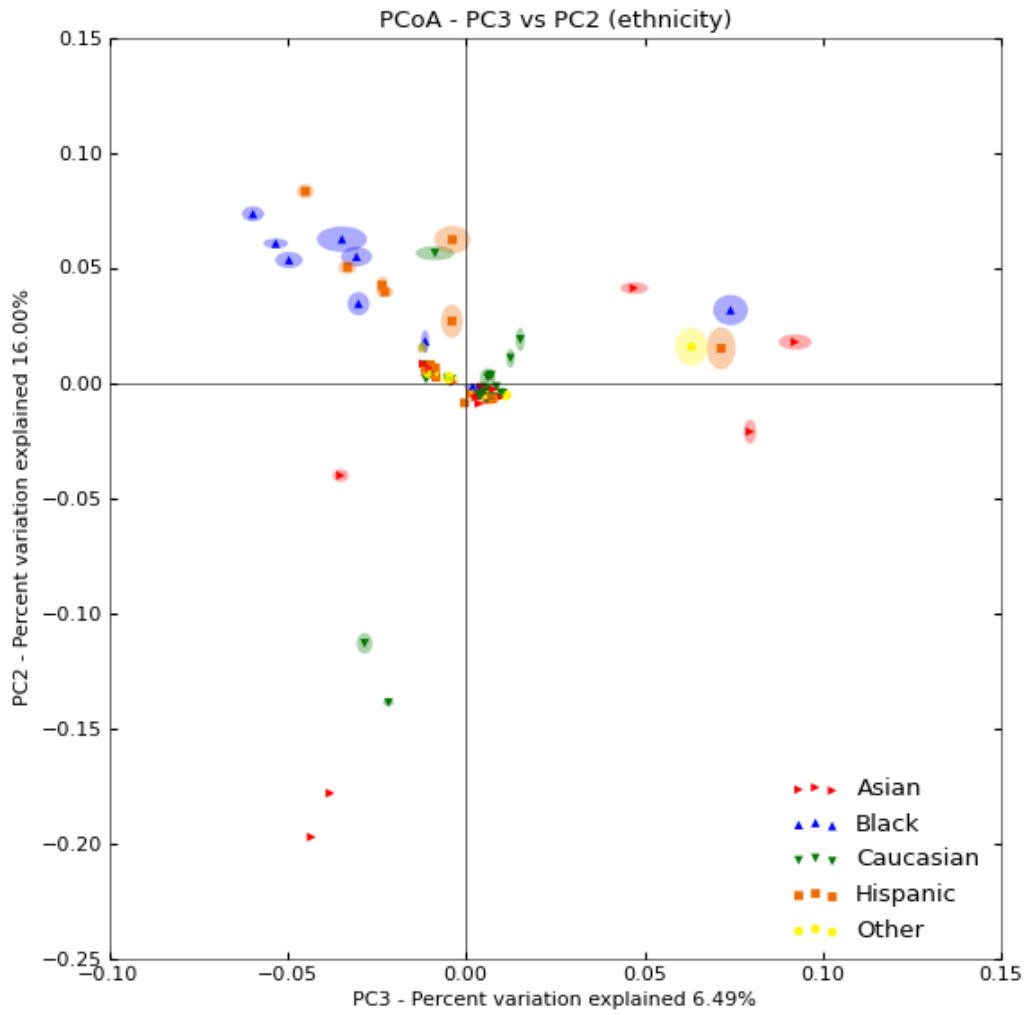

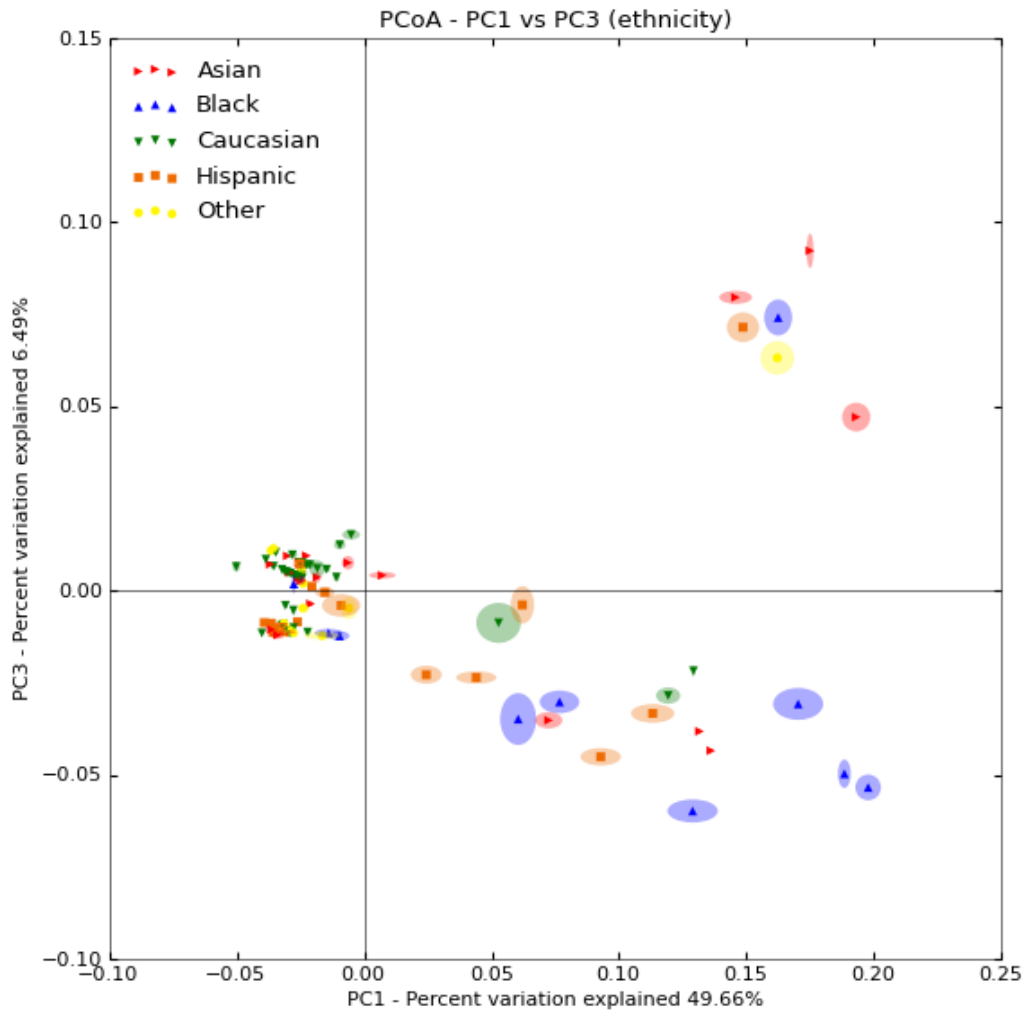

Figure S3. Principal Coordinate Analyses (PCoA) of outcome.

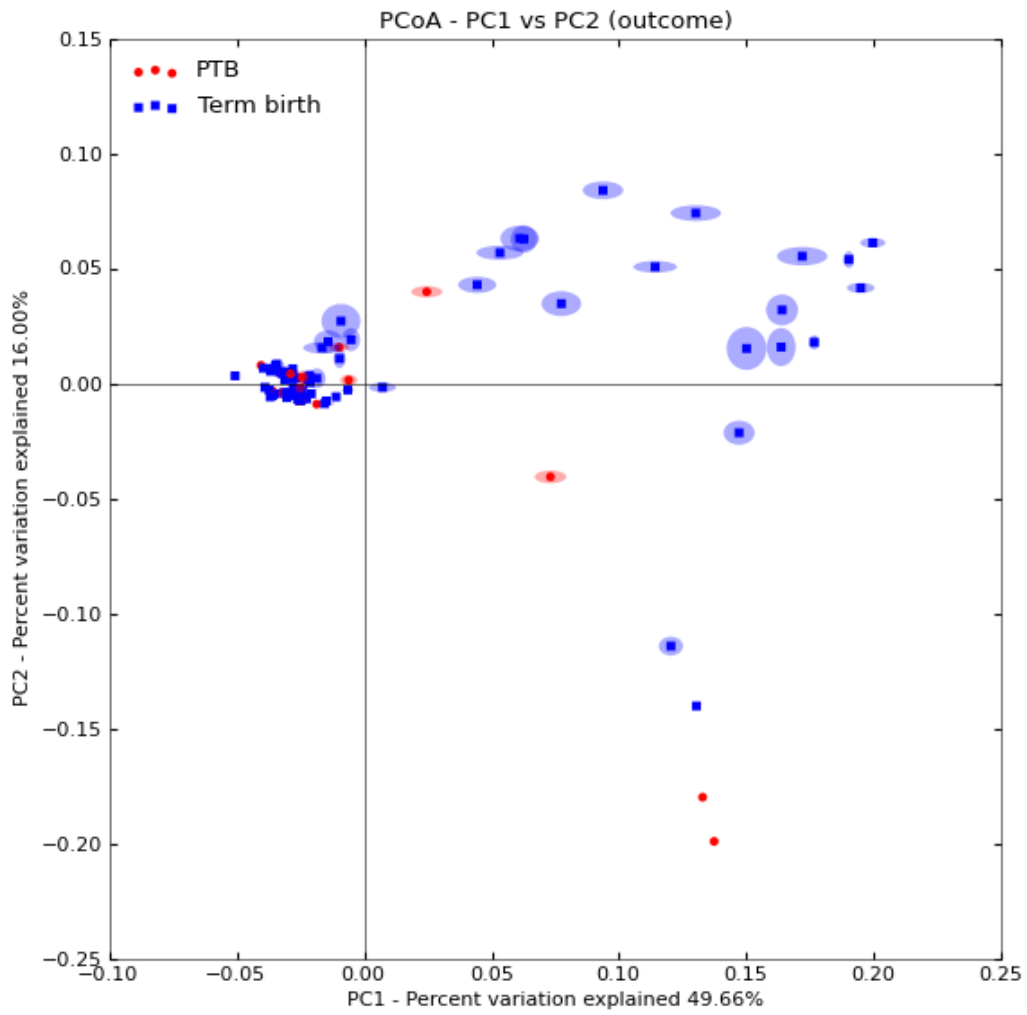

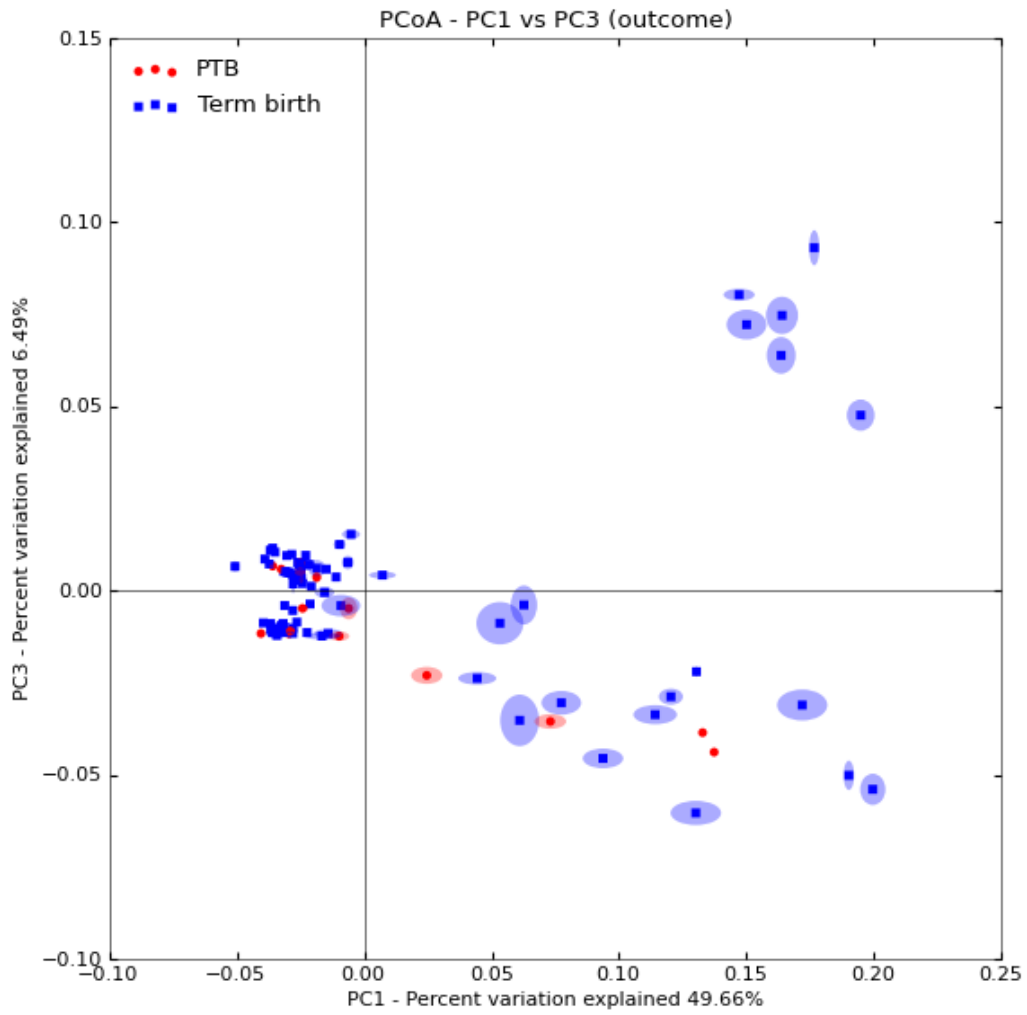

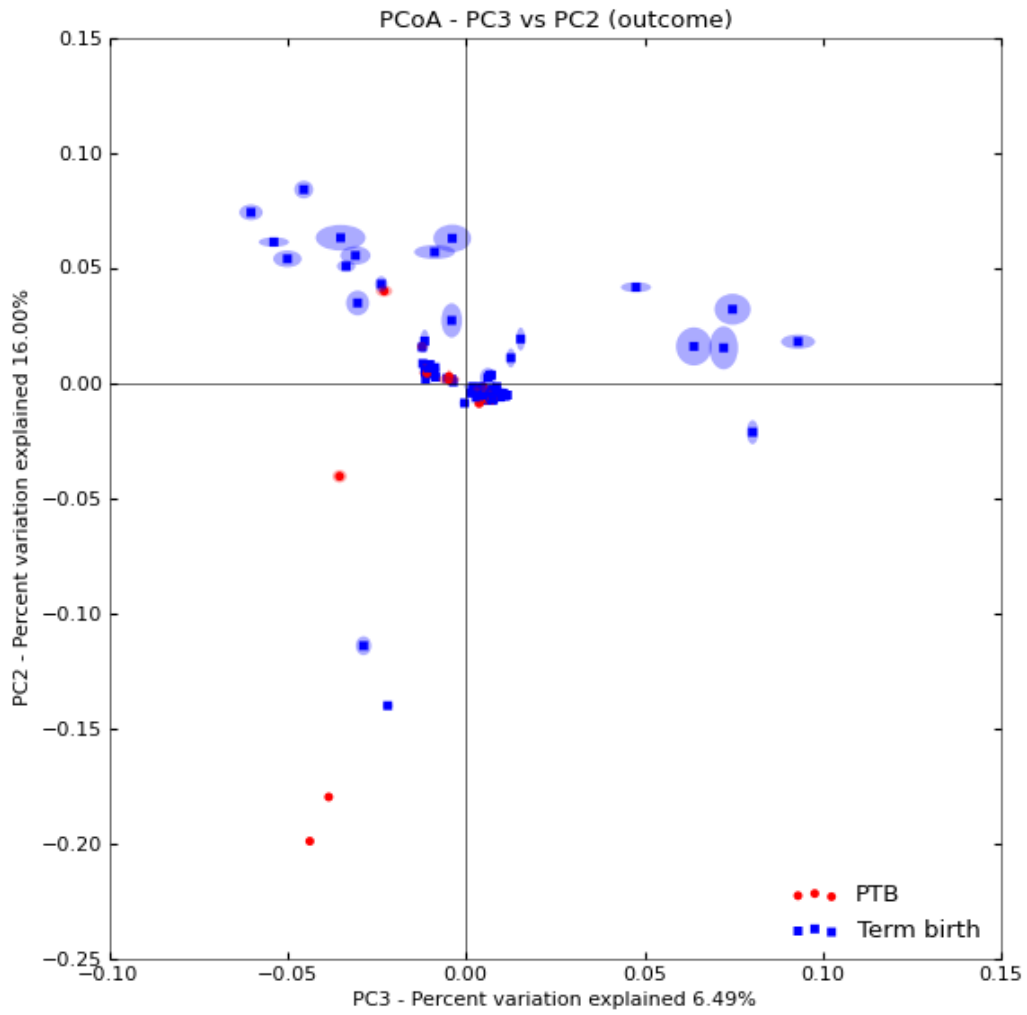

Supplement: RS488838_Supplemental_Material.pdf [file RS488838_Supplemental_Material.pdf]
